# Supplementary material
Source: publisher site journal article supplement (https://www.dovepress.com/article/465631)
Supplement: Supplementary file 1 [file get_supplementary_file.php]

NIR-II-absorbing NDI Polymer with Superior Penetration Depth for Enhanced Photothermal Therapy Efficiency of Hepatocellular Carcinoma

Bei Li1,2,#, Yuting Luo1,2,#, Geng Liu1,2, Maling Gou3, Lei Feng1,2, Xiwen Ye1,2, Jianrong Xu1,2, Yaotian Fan1,2, Zhen You1,2,*

1. Division of Biliary Surgery, Department of General Surgery, West China Hospital,

Sichuan University, Chengdu 610041, Sichuan, China

2. Research Center for Biliary Diseases, West China Hospital, Sichuan University,

Chengdu 610041, Sichuan, China.

1. Department of Biotherapy, Cancer Center and State Key Laboratory of Biotherapy，West China Hospital, Sichuan University，Chengdu 610041, Sichuan, China

#These authors contributed to the work equally.

*Correspondence:Prof. Zhen You, E-mail: youzhen@wchscu.cn, Fax: +86 028 85423823, Tel: +86 028 85423823


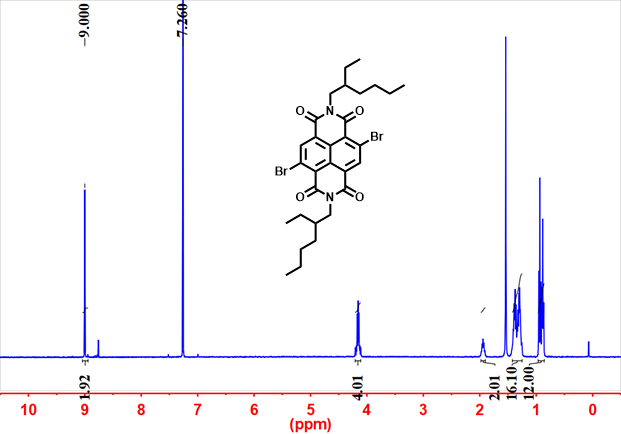


**Figure S1.** The 1H NMR spectrum of NDI-2Br.


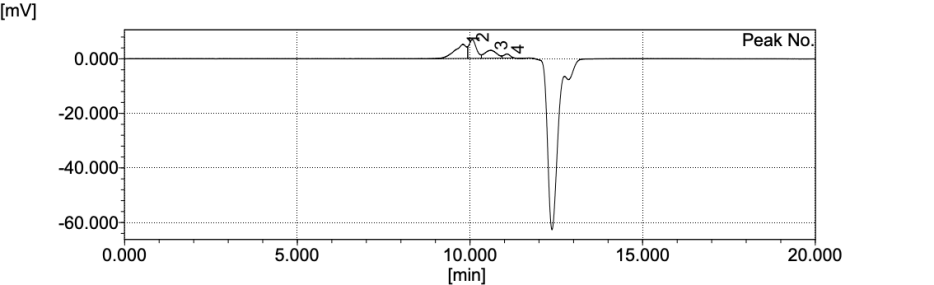

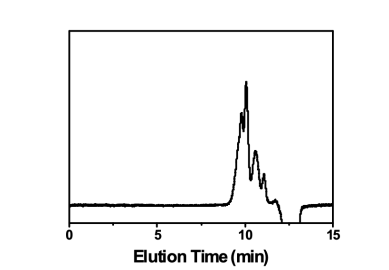


**Figure S2.** The Gel Permeation Chromatography (GPC)of NDI polymer.


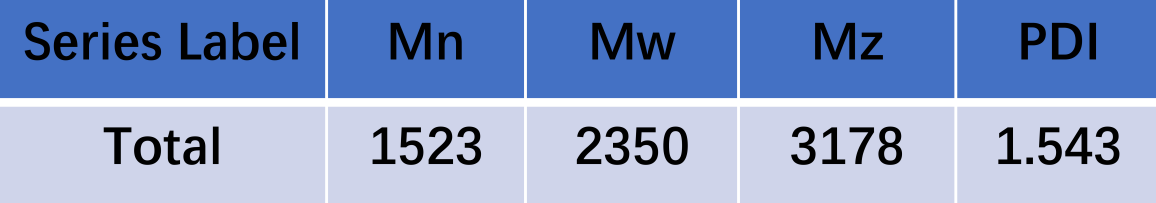


**Figure S3.** The GPC analysis of NDI polymer (Mn: number-average molecular weight, Mw: weight-average molecular weight, Mz: z-average molecular weight, PDI: polymer dispersity index).


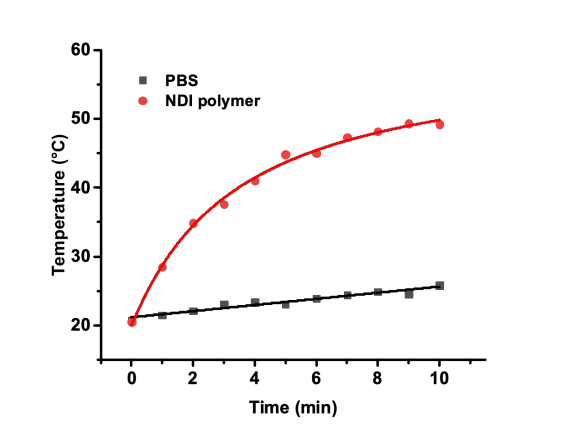


**Figure S4.** The related temperature value of PBS and NDI polymer solution (0.1 mg/mL) in the presence of 808 nm laser treatment (1.0 W/cm2, 5 min).


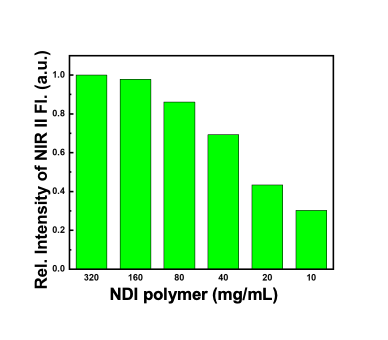


**Figure S5.** The semi-quantitative NIR-II fluorescence analysis of NDI polymer at different concentrations under 980 nm laser.


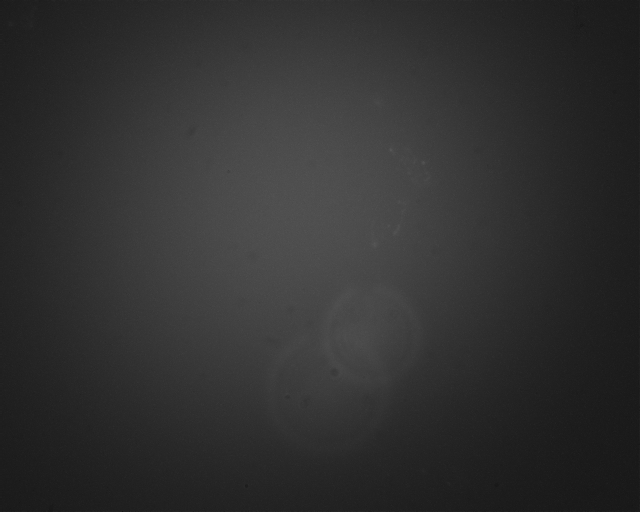


**Figure S6.** The NIR-II fluorescent images of Huh-7 cells in Control group with 980 nm laser.
